# Supplementary material
Source: PubMed Central journal article supplement (PMC3422704)
Supplement: supp_mol.112.078584_Supplementary_Figure_1.pdf [file supp_mol.112.078584_Supplementary_Figure_1.pdf]

## Supplementary Figure 1

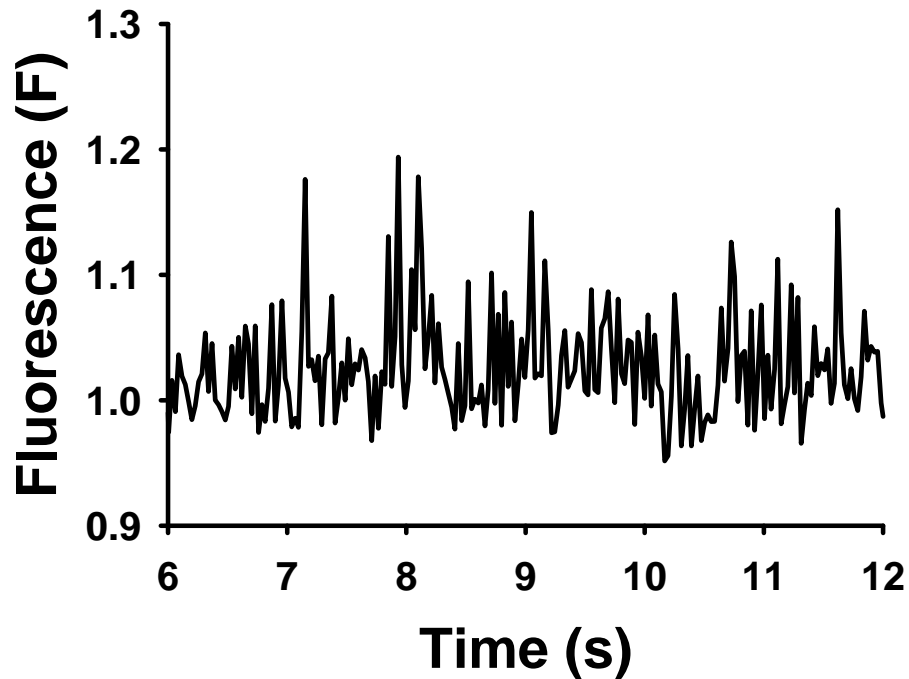

**Supplementary Figure 1: Basal Event Amplitudes are Broadly Distributed.** Representative trace of fluorescence (F) over time within an active ROI on an unstimulated. Event amplitudes display a broad, random distribution, indicating the activity of multiple Ca<sup>2+</sup> influx channels under basal conditions.
