# Supplementary material
Source: PubMed Central journal article supplement (PMC3422704)
Supplement: supp_mol.112.078584_Supplementary_Figure_2.pdf [file supp_mol.112.078584_Supplementary_Figure_2.pdf]

## Supplementary Figure 2

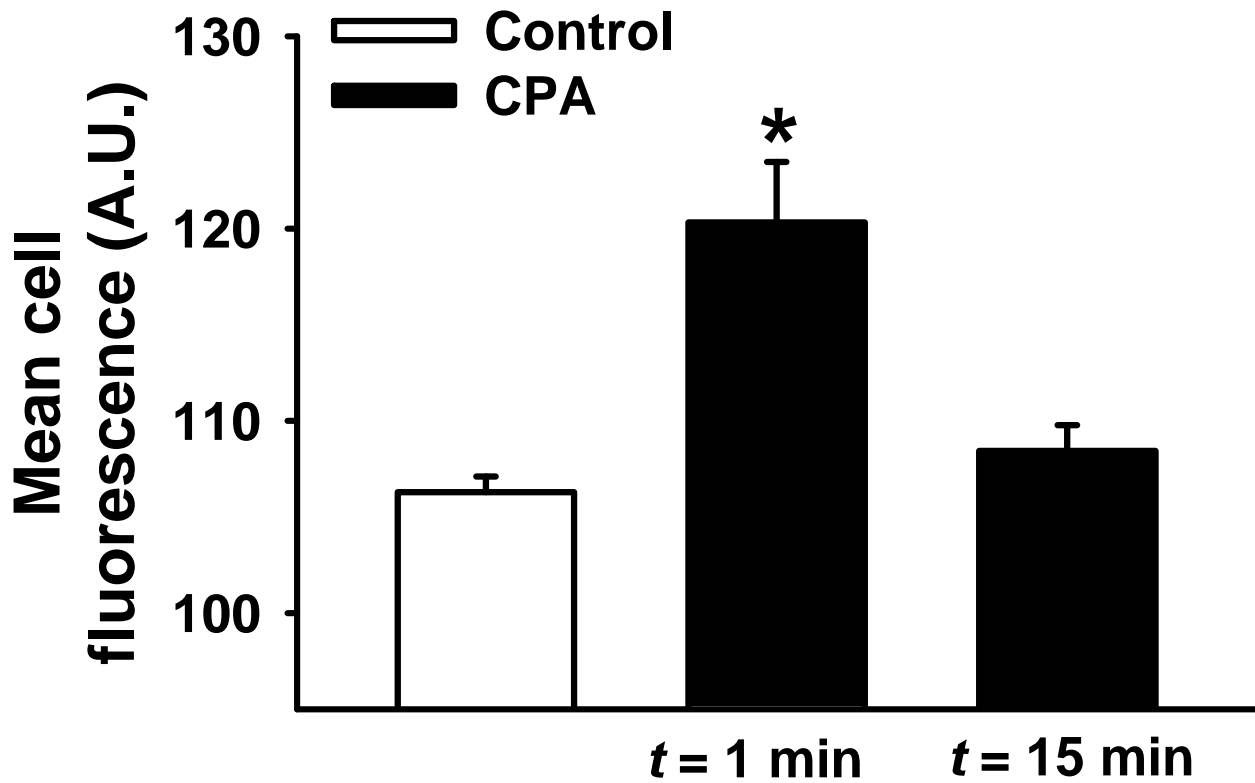

**Supplementary Figure 2: Endothelial Cell CPA Treatment.** Mean cell fluorescence (A.U.) of cells before (Control) and 1 and 15 minutes following addition of CPA (10  $\mu$ M). ( $n = 10$  for all groups); \* $P \leq 0.05$  vs. Control.
