# Supplementary material
Source: PubMed Central journal article supplement (PMC3422704)
Supplement: supp_mol.112.078584_Supplementary_Figure_3.pdf [file supp_mol.112.078584_Supplementary_Figure_3.pdf]

### Supplementary Figure 3

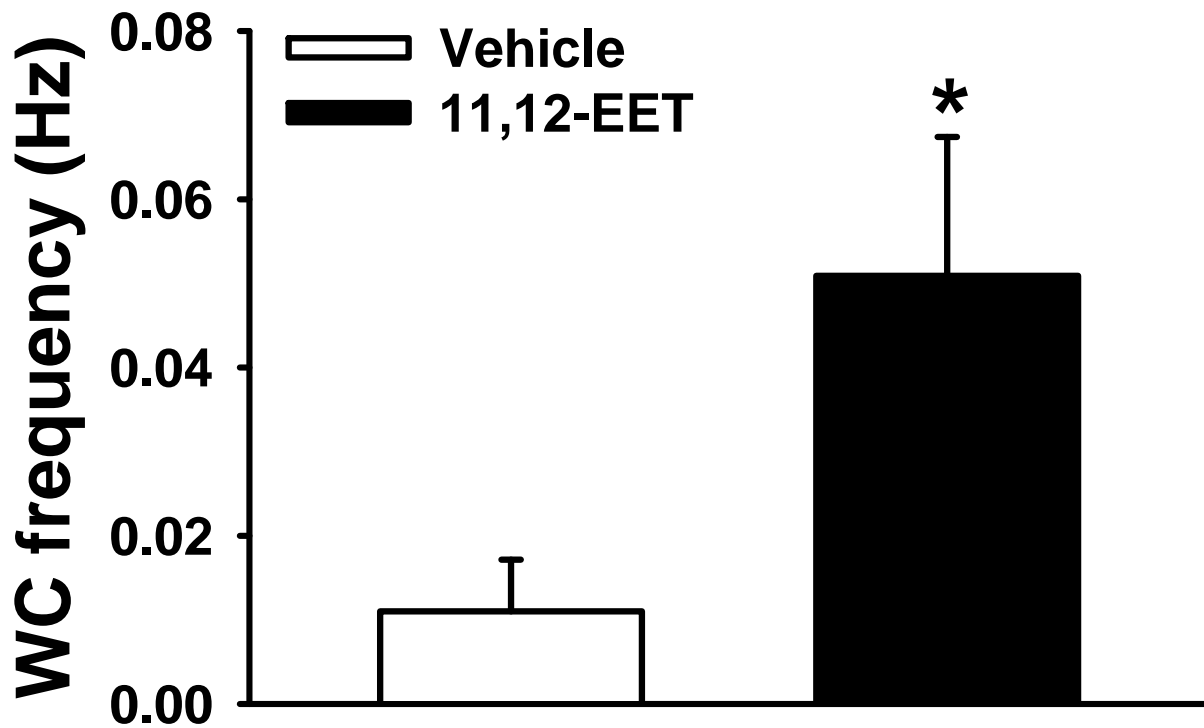

**Supplementary Figure 3: 11,12-EET Stimulates TRPV4-Mediated Ca<sup>2+</sup> Events in Endothelial Cells.** Mean data showing an increase in the whole-cell (WC) frequency of Ca<sup>2+</sup> events with addition of 11,12-EET (3  $\mu$ M) to the bathing solution compared to vehicle addition (1% DMSO) ( $n = 18$  for vehicle,  $n = 19$  for 11,12-EET); \* $P \leq 0.05$  vs. Vehicle.
