# Supplementary material
Source: PubMed Central journal article supplement (PMC3422704)
Supplement: supp_mol.112.078584_Supplementary_Movie_1_and_2_Legends.pdf [file supp_mol.112.078584_Supplementary_Movie_1_and_2_Legends.pdf]

MOLECULAR PHARMACOLOGY  
MOL #78584

**Supplementary Movie 1: Basal Ca<sup>2+</sup> Channel Activity in Primary Endothelial Cells.** Representative TIRFM recording of a primary human microvascular endothelial cell under basal conditions. Recording was converted to a pseudo-color video to emphasize transient changes in fluorescence; blue to green/yellow notes an increase in fluorescence, indicating an increase in [Ca<sup>2+</sup>]; frame rate = 15 frames/s.

**Supplementary Movie 2: GSK1016790A Stimulates an Increase in Endothelial Ca<sup>2+</sup> Influx.** Representative TIRFM recording of a primary human microvascular endothelial cell in the presence of the selective TRPV4 agonist GSK1016790A (100 nM), indicating a dramatic increase in whole-cell frequency of Ca<sup>2+</sup> influx events; frame rate = 15 frames/s.
