# Supplementary material
Source: PubMed Central journal article supplement (PMC3422704)
Supplement: supp_mol.112.078584_Supplementary_Table_1.pdf [file supp_mol.112.078584_Supplementary_Table_1.pdf]

**Optical Recording Reveals Novel Properties of GSK1016790A-Induced TRPV4  
Channel Activity in Primary Human Endothelial Cells**

Michelle N. Sullivan, Michael Francis, Natalie L. Pitts, Mark S. Taylor, and Scott Earley

**Supplementary Table 1**

| <b>Ca<sup>2+</sup> Microdomains</b> | <b>WC Frequency (Hz)</b> | <b>Duration (s)</b> |
|-------------------------------------|--------------------------|---------------------|
| <b>Sparks</b>                       | <b>0.24</b>              | <b>0.03</b>         |
| <b>Sparklets</b>                    | <b>N/A</b>               | <b>0.03, 0.08</b>   |
| <b>Pulsars</b>                      | <b>0.10 ± 0.02</b>       | <b>0.26</b>         |
| <b>Events in ECs</b>                | <b>0.11 ± 0.02</b>       | <b>2.67 ± 0.13</b>  |

**Supplementary Table 1: Novel Transient Ca<sup>2+</sup> Events in Endothelial Cells.** Ca<sup>2+</sup> events observed in primary endothelial cells using TIRFM have a much longer duration compared to previously described calcium microdomains; this suggests that the events recorded using TIRFM are novel.
